# Supplementary material
Source: publisher site journal article supplement (https://www.spandidos-publications.com/808/downloadSupplementary)

Figure S1. EKVX cells were transfected with miR-30a-3p mimic, miR-30a-3p inhibitor, or the negative control (NC) for 48 h. RT-qPCR was performed to verify the transfection efficiency. \* $P < 0.05$ , \*\* $P < 0.01$ , compared with the NC.

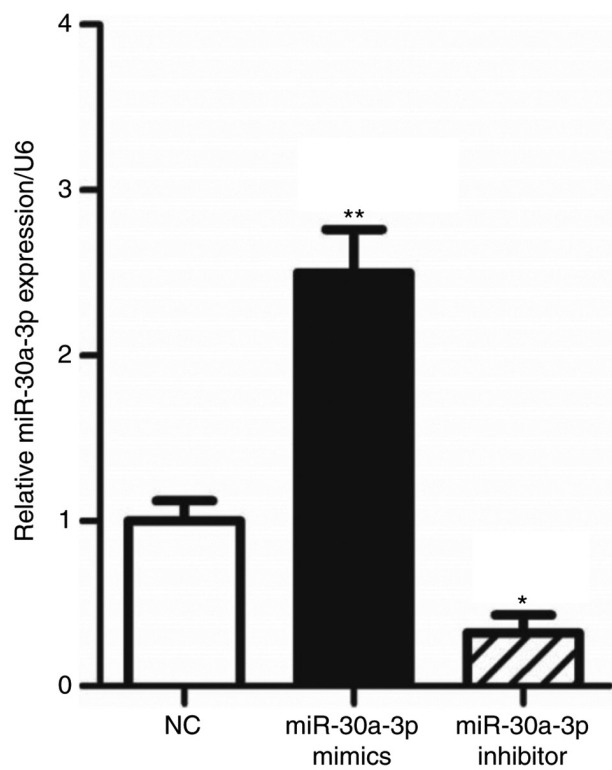

Figure S2. miR-30a-3p regulates A549 cell growth and colony formation by targeting CNPY2. (A) Cell proliferation and (B) colony formation of A549 cells were measured by CCK-8 and colony formation assays post si-CNPY2 and si-control transfection (\*\*P<0.01, \*P<0.05, compared with the NC). CNPY2, canopy fibroblast growth factor signaling regulator 2.

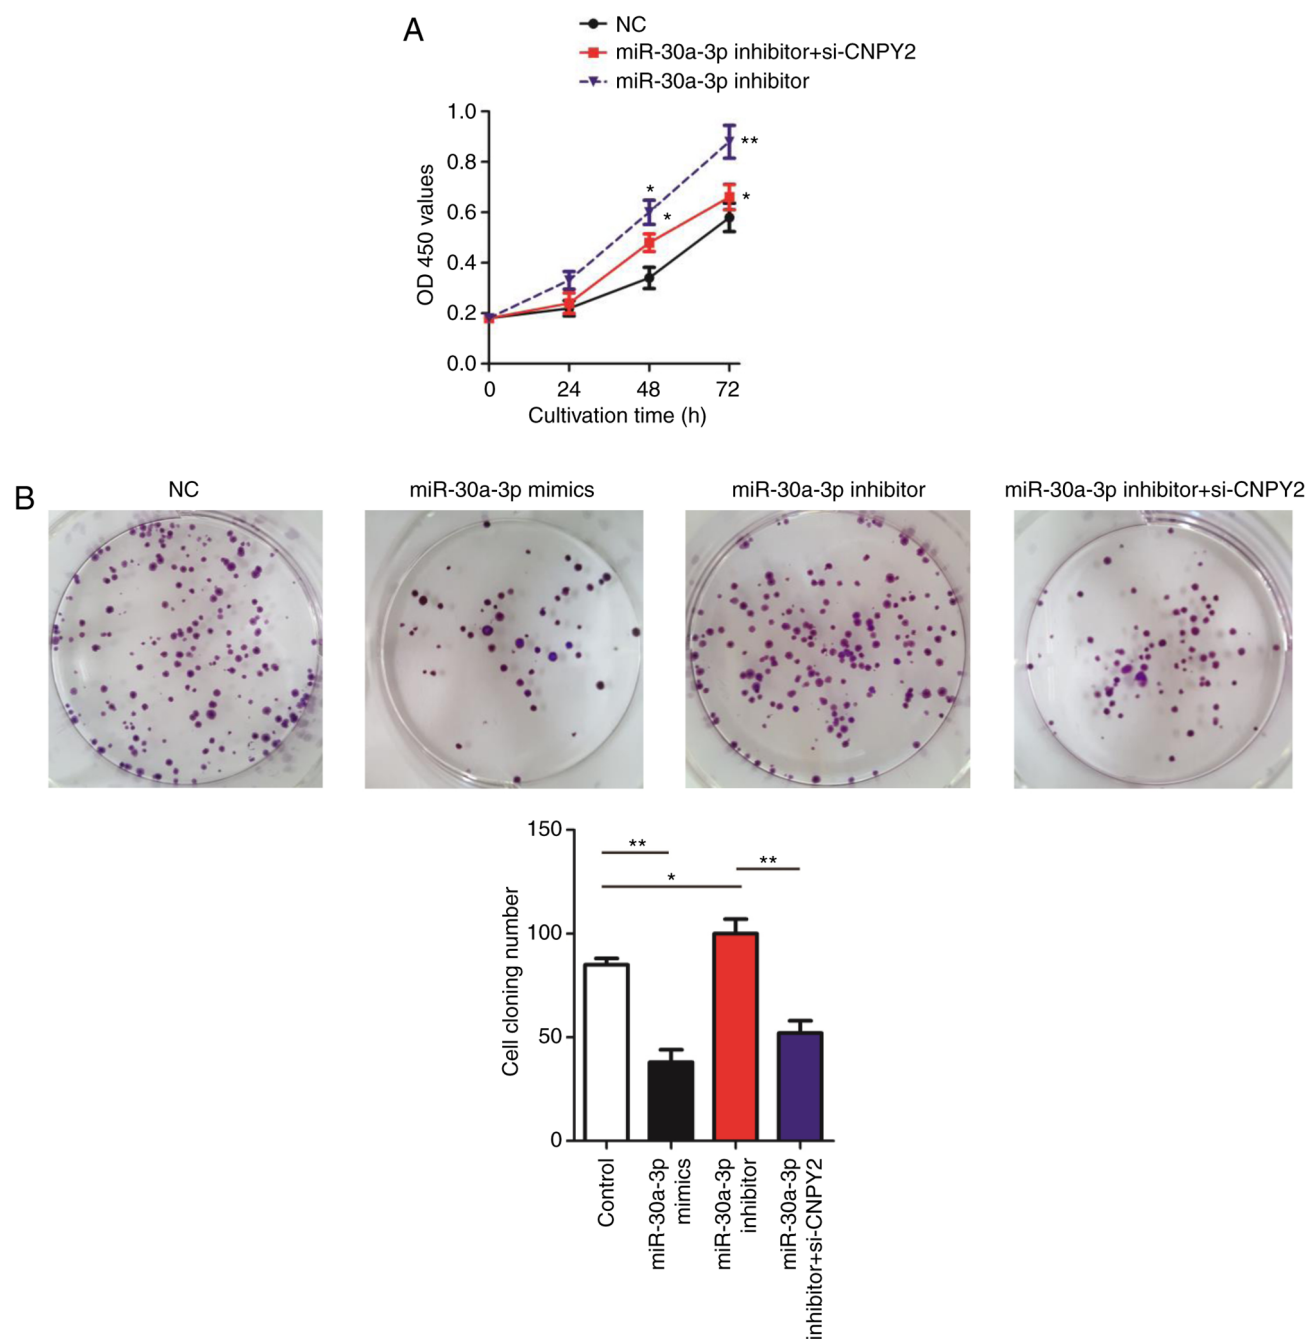

Supplement: Supplementary file 1 [file downloadSupplementary]
